# Supplementary material for: SIO: A Spatioimageomics Pipeline to Identify Prognostic Biomarkers Associated with the Ovarian Tumor Microenvironment
Source: PubMed Central journal article supplement (PMC8068305; doi:10.3390/cancers13081777), 2021-04-08
Supplement: cancers-13-01777-s001.pdf [file cancers-13-01777-s001.pdf]

# Supplementary Materials: SIO: A Spatioimageomics Pipeline to Identify Prognostic Biomarkers Associated with the Ovarian Tumor Microenvironment

Ying Zhu, Sammy Ferri-Borgogno, Jianting Sheng, Tsz-Lun Yeung, Jared K. Burks, Paola Cappello, Amir A. Jazaeri, Jae-Hoon Kim, Gwan Hee Han, Michael J. Birrer, Samuel C. Mok and Stephen T.C. Wong

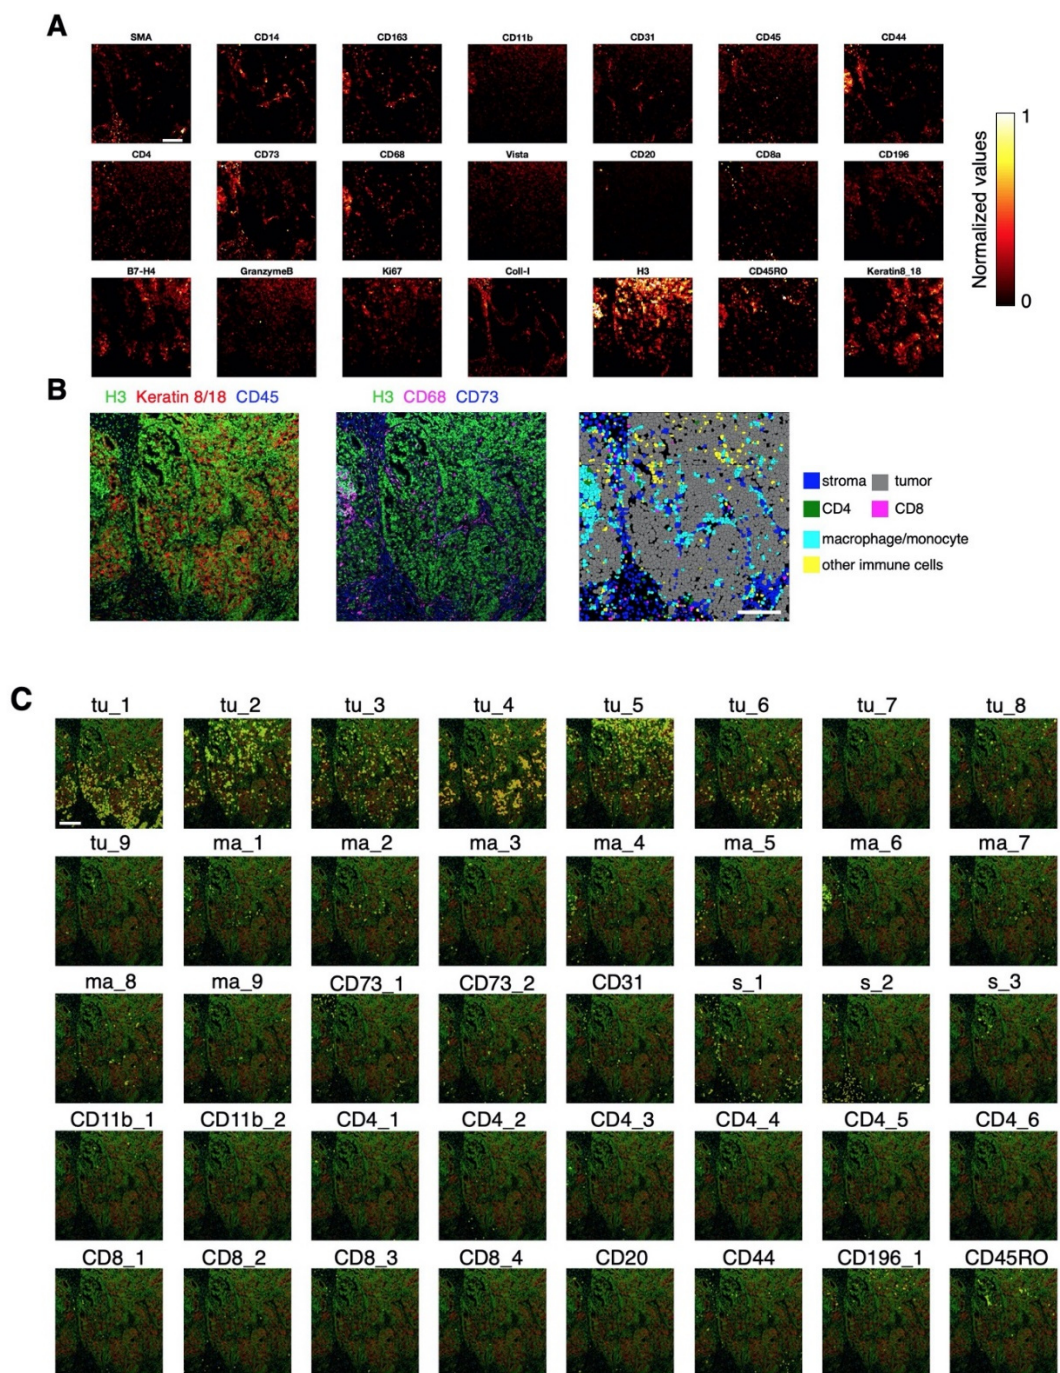

**Figure S1.** Spatial distribution of all the cell subtypes from a representative sample. **A.** A map of the normalized expression of each marker on the cell masks. **B.** (Left) IMC image with three channels Keratin 8/18, H3, CD45 shown in red, green and blue, respectively. (Middle) IMC image with three channels CD68, H3, CD73 shown in magenta, green and blue, respectively. (Right) The spatial distribution of multiple major cell subtypes. **C.** Spatial distributions of each cell subtype are shown as transparent yellow masks placed on top of the IMC image the same as the one in **B** (left). **A-C** are from the same IMC sample. White scale bar, 200  $\mu\text{m}$ .

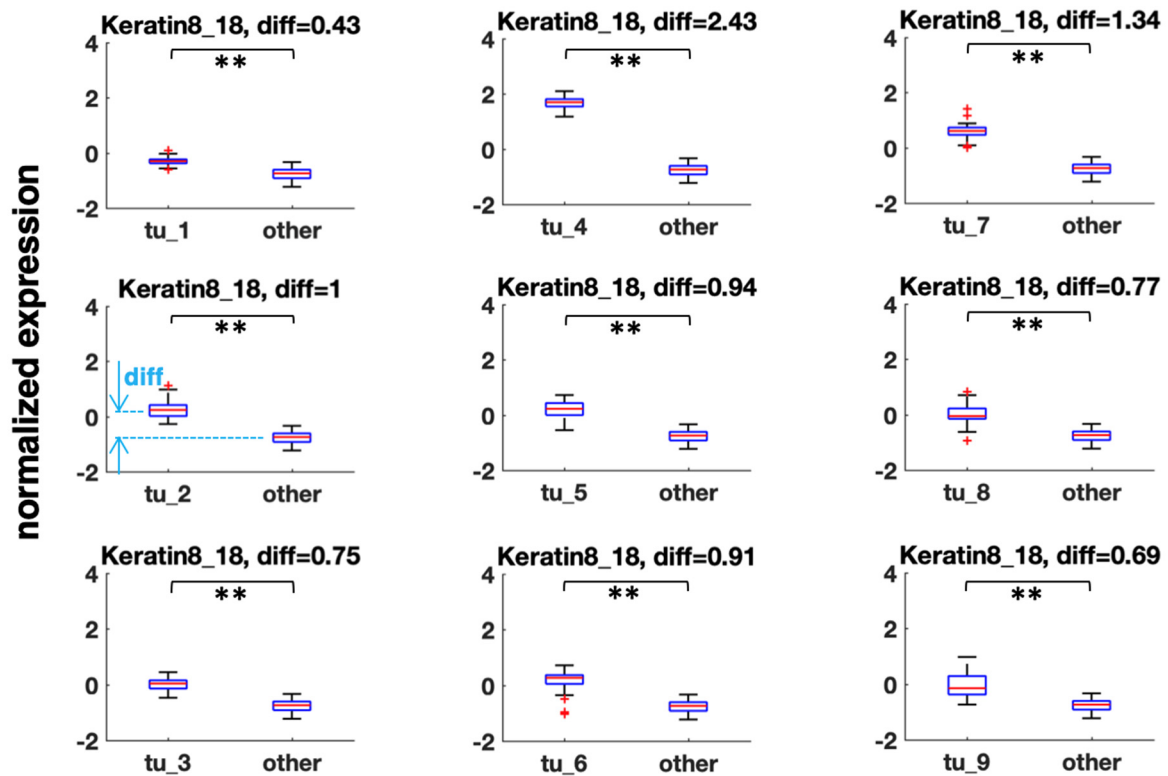

**Figure S2.** Normalized marker expression of tumor subtypes compared with non-tumor cells. Each data point represents the median of the normalized marker expression of a group of cells for each sample. Two-sample *t* test,  $**p < 0.01$ . "Diff" is computed as the difference between the mean of two groups.

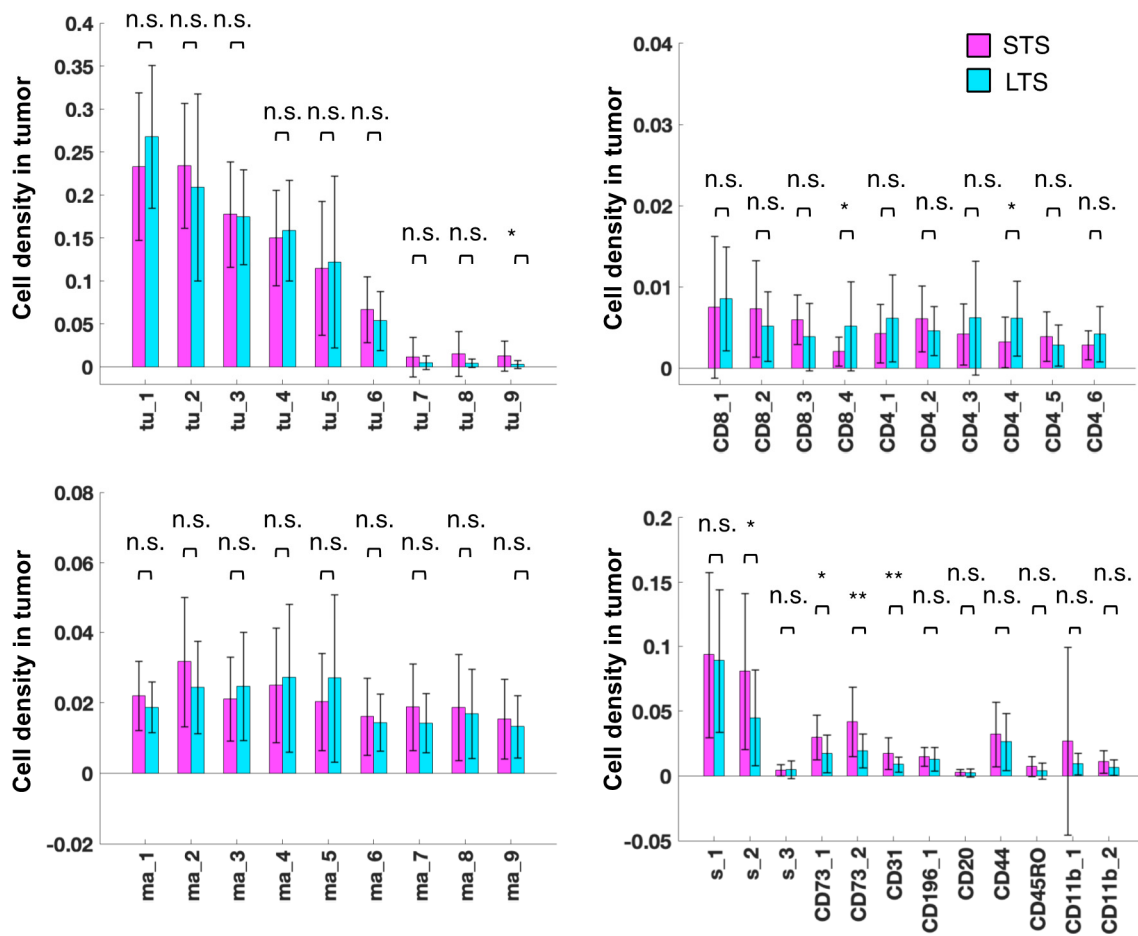

**Figure S3.** Comparison of cell subtype densities in tumor-enriched regions between long-term survivors (LTS) and short-term survivors (STS). Two sample *t* test, \*  $p < 0.05$ , \*\*  $p < 0.01$ , n.s. not significant.



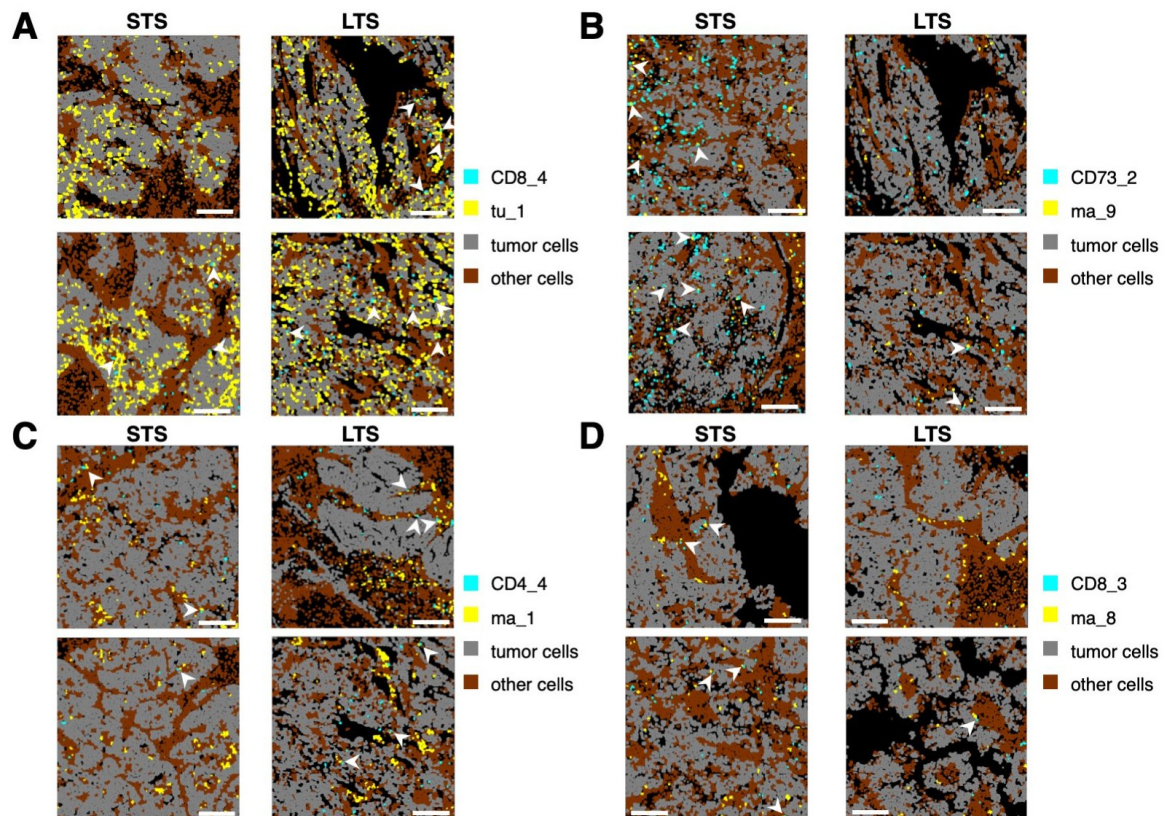

**Figure S4.** Spatial distribution of pairs of cell subtypes of interest. White scale bar, 200  $\mu$ m. White arrowhead, interaction between two different cell subtypes. **A.** Interaction between granzyme B<sup>+</sup> CD8<sup>+</sup> cytotoxic T cells (CD8\_4) and tu\_1 tumor cells. **B.** Interaction between CD73<sup>mid</sup> cells (CD73\_2) and CD163<sup>+</sup> CD68<sup>+</sup> CD14<sup>+</sup> macrophages (ma\_9). **C.** Interaction between CD45RO<sup>+</sup> CD4<sup>+</sup> memory T cells (CD4\_4) and CD163<sup>+</sup> CD68<sup>+</sup> Vista<sup>mid</sup> CD14<sup>+</sup> macrophages (ma\_1). **D.** Interaction between CD45RO<sup>+</sup> CD44<sup>+</sup> CD8<sup>+</sup> memory T cells (CD8\_3) and CD163<sup>+</sup> CD14<sup>mid</sup> macrophages (ma\_8) macrophages.

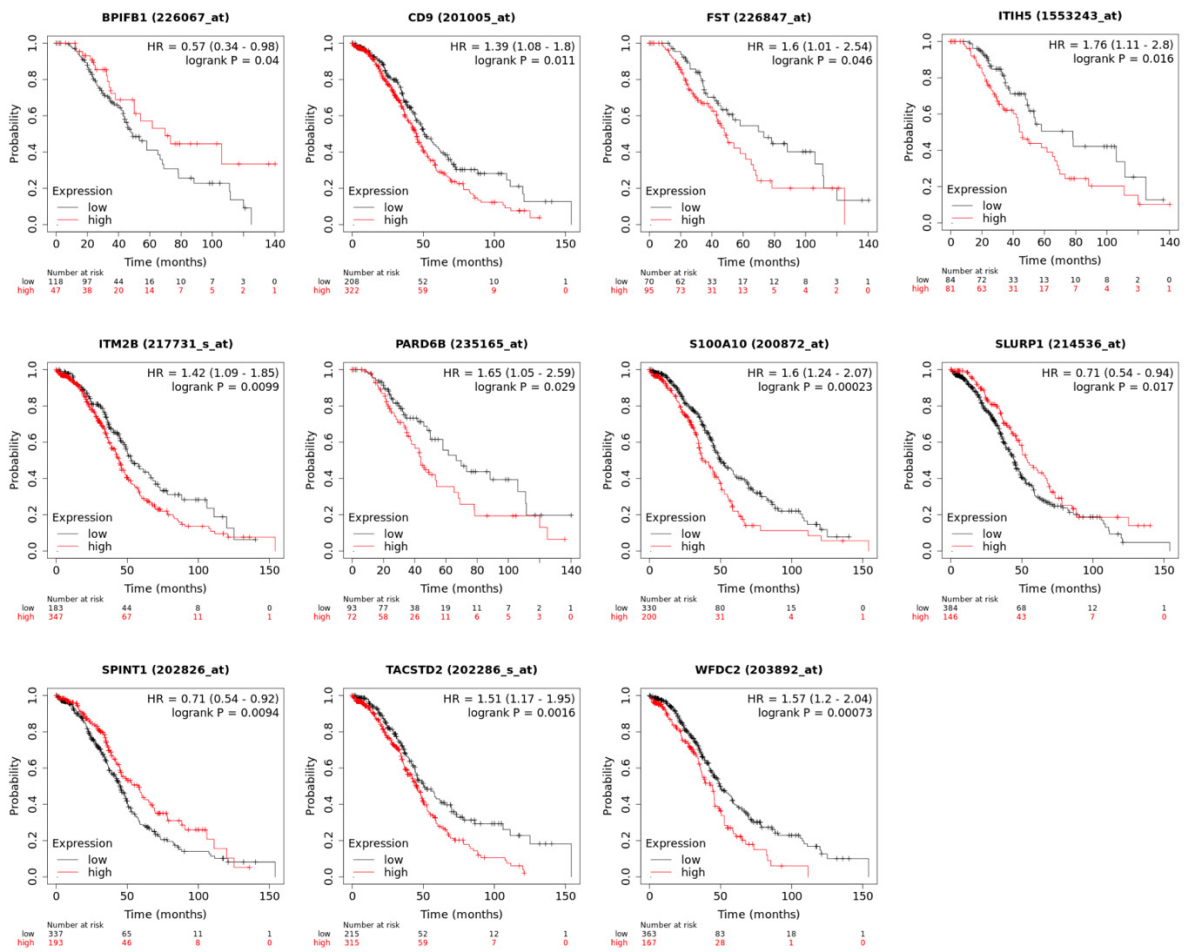

**Figure S5.** Kaplan-Meier plots of various genes of interest in the microdissected epithelial component of high-grade serous ovarian cancer. HR, hazard ratio.

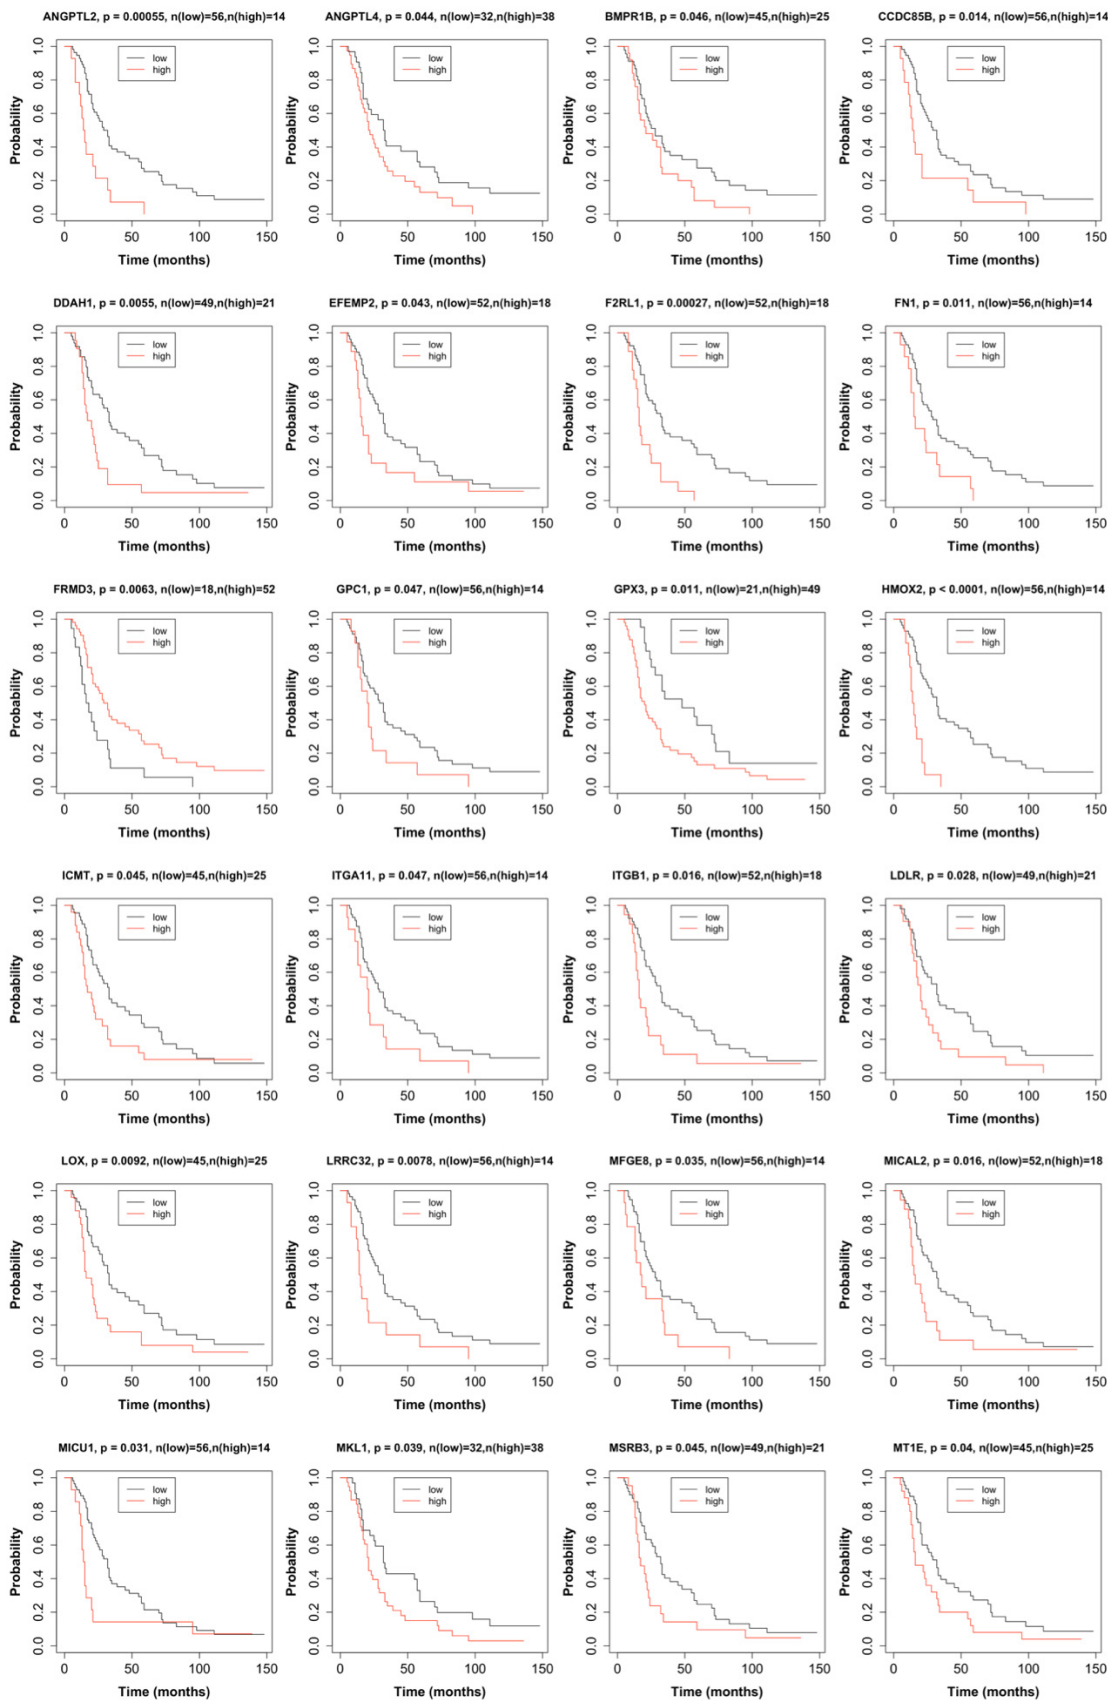

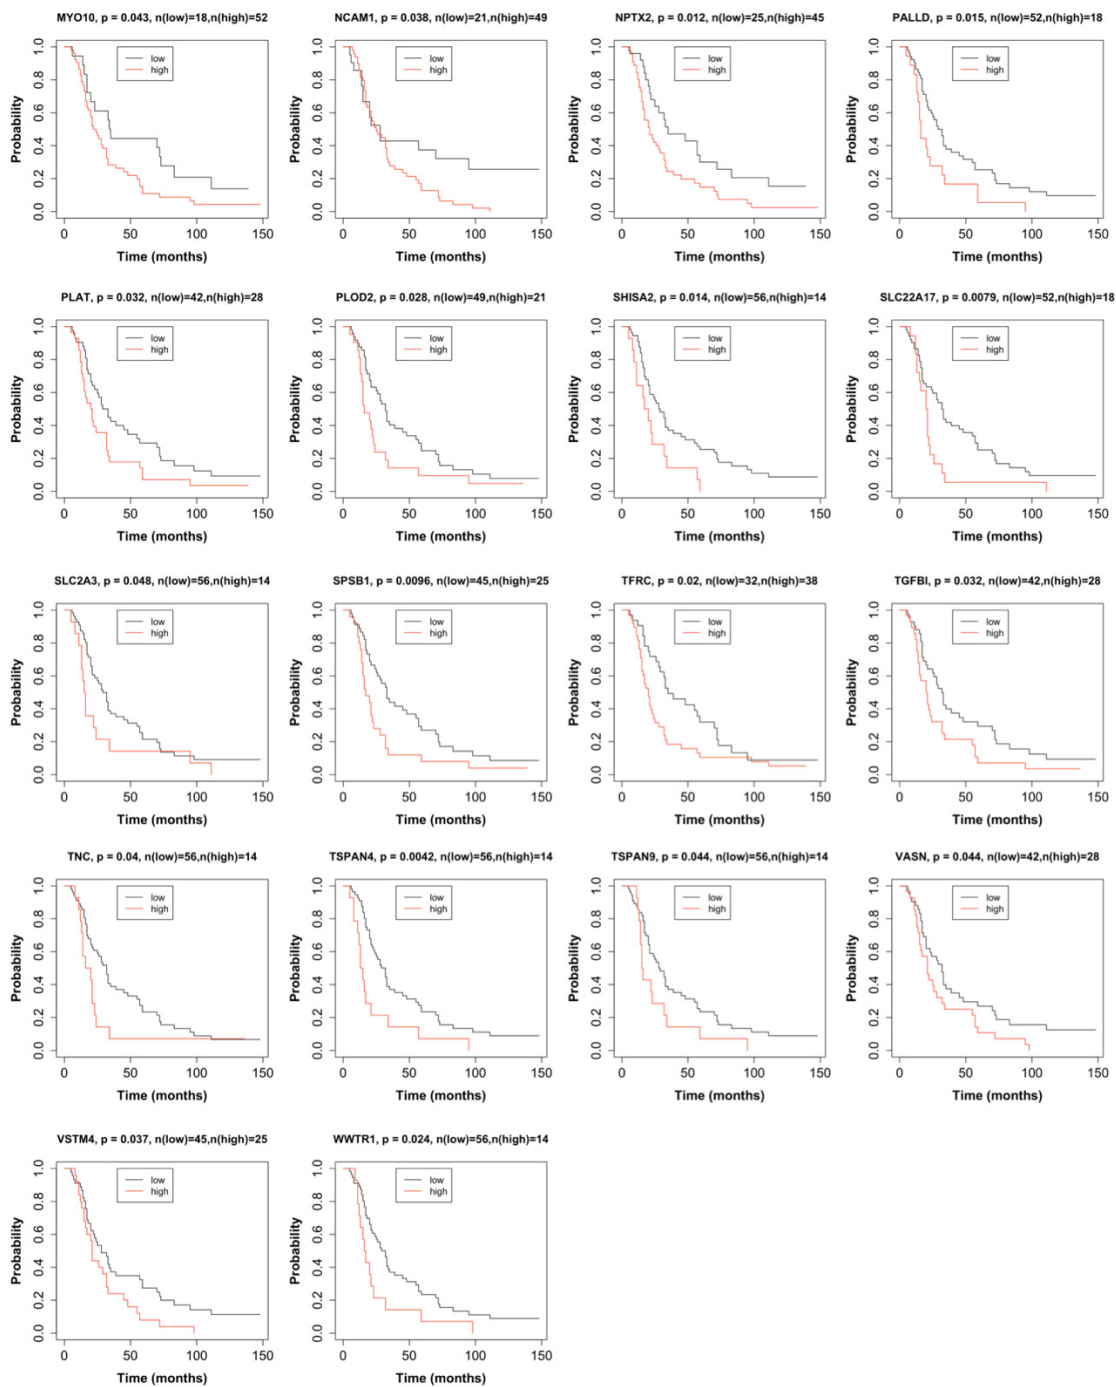

**Figure S6.** Kaplan-Meier plots of various genes of interest in the microdissected fibroblastic stromal component of high-grade serous ovarian cancer.

**Table S1.** Clinicopathologic characteristics of samples used in the study.

| Variable                | LTS | STS | <i>p</i> *           |
|-------------------------|-----|-----|----------------------|
| Total number of samples | 21  | 20  |                      |
| Age                     |     |     | 0.013                |
| <50 years               | 7   | 2   |                      |
| >50 years               | 14  | 18  |                      |
| Race                    |     |     | 2.5*10 <sup>-5</sup> |
| Asian                   | 16  | 2   |                      |
| White                   | 5   | 18  |                      |
| Stage                   |     |     | 0.61                 |
| III                     | 20  | 18  |                      |
| IV                      | 1   | 2   |                      |
| Grade                   |     |     | 0.70                 |
| 2                       | 5   | 3   |                      |
| 3                       | 16  | 17  |                      |

LTS, long-term survivors: patients survived  $\geq 60$  months, STS, short-term survivors: patients survived  $\leq 20$  months, \*Fisher exact test (two-sided).

**Table S2.** Antibodies used for the study.

| Metal tag | Antigen         | Antibody clone | Catalog n. | Vendor   |
|-----------|-----------------|----------------|------------|----------|
| 166Er     | B7-H4           | H74            | 3166030D   | Fluidigm |
| 160Gd     | Vista           | D1L2G          | 3160025D   | Fluidigm |
| 161Dy     | CD20            | H1             | 3161029D   | Fluidigm |
| 162Dy     | CD8a            | D8A8Y          | 3162035D   | Fluidigm |
| 163Dy     | CD196/ CCR6     | Polyclonal     | 3163029D   | Fluidigm |
| 167Er     | Granzyme B      | EPR20129-217   | 3167021D   | Fluidigm |
| 168Er     | Ki-67           | B56            | 3168022D   | Fluidigm |
| 169Tm     | Collagen Type I | Polyclonal     | 3169023D   | Fluidigm |
| 171Yb     | Histone 3       | D1H2           | 3171022D   | Fluidigm |
| 158Gd     | CD73            | EPR6115        | 3158031D   | Fluidigm |
| 173Yb     | CD45RO          | UCHL1          | 3173016D   | Fluidigm |
| 174Yb     | Keratin 8/18    | C51            | 3174022D   | Fluidigm |
| 144Nd     | CD14            | EPR3653        | 3144025D   | Fluidigm |
| 147Sm     | CD163           | EDHu-1         | 3147021D   | Fluidigm |
| 149Sm     | CD11b           | EPR1344        | 3149028D   | Fluidigm |
| 151Eu     | CD31            | EPR3094        | 3151025D   | Fluidigm |
| 152Sm     | CD45            | CD45-2B11      | 3152016D   | Fluidigm |
| 156Gd     | CD4             | EPR6855        | 3156033D   | Fluidigm |
| 153Eu     | CD44            | IM7            | 3153029D   | Fluidigm |
| 141Pr     | SMA             | 1A4            | 3141017D   | Fluidigm |
| 159Tb     | CD68            | KP1            | 3159035D   | Fluidigm |

**Table S3.** Spearman correlations between IMC cell densities and selected genes in microdissected epithelial compartment of HGSC.

| Gene Name     | Correlated IMC Feature | Correlation Coefficient | <i>p</i> | Kaplan-Meier Survival <i>p</i> * | Function                                                                                              | Refs.   |
|---------------|------------------------|-------------------------|----------|----------------------------------|-------------------------------------------------------------------------------------------------------|---------|
| <i>BPIFB1</i> | CD4_4                  | 0.533                   | 0.0050   | 0.04                             | Inhibits cell migration and invasion; good prognosis                                                  | [34]    |
| <i>CD9</i>    | CD4_4                  | -0.434                  | 0.0266   | 0.011                            | Cell motility, tumor metastasis, CD4 <sup>+</sup> T cell activation; poor prognosis in ovarian cancer | [35,36] |



|                       |        |        |        |        |                                                                                                                   |               |
|-----------------------|--------|--------|--------|--------|-------------------------------------------------------------------------------------------------------------------|---------------|
| <i>FST</i>            | CD31   | 0.493  | 0.0103 | 0.046  | Regulates autocrine endothelial cell activity and induces angiogenesis                                            | [91,92]       |
| <i>ITIH5</i>          | CD8_4  | -0.442 | 0.0237 | 0.016  | Tumor suppressor gene, extracellular matrix modulator, blocks T cell infiltration                                 | [37]          |
|                       | CD4_4  | -0.430 | 0.0283 |        |                                                                                                                   |               |
| <i>ITM2B</i>          | CD4_4  | -0.426 | 0.0297 | 0.0099 | Induces apoptosis in activated T cells                                                                            | [86]          |
| <i>PARD6B</i>         | CD31   | 0.446  | 0.0222 | 0.029  | Increases metastatic potential                                                                                    | [93]          |
| <i>S100A10</i>        | CD73_1 | 0.416  | 0.0342 | 0.0002 | Involved in tumor progression, invasion, and metastasis; poor prognosis in ovarian cancer                         | [94]          |
|                       | CD73_2 | 0.440  | 0.0242 |        |                                                                                                                   |               |
| <i>SLURP1</i>         | CD4_4  | 0.451  | 0.0206 | 0.017  | Antitumor activity, regulates Ca <sup>2+</sup> signaling following T cell activation                              | [38,39,56]    |
|                       | CD73_2 | -0.477 | 0.0135 |        |                                                                                                                   |               |
| <i>SPINT1 (HAI-1)</i> | CD31   | -0.523 | 0.0060 | 0.0094 | Regulates metastatic invasion and tumor-immune microenvironment crosstalk; good prognosis                         | [95,96]       |
| <i>TACSTD2</i>        | CD8_4  | -0.642 | 0.0004 | 0.0016 | Epithelial barrier protein, blocks T cell infiltration                                                            | [97]          |
| <i>WFDC2 (HE4)</i>    | CD8_4  | -0.529 | 0.0054 | 0.0007 | Promotes tumor growth, suppresses CD8 <sup>+</sup> T cell activation; increases chemoresistance in ovarian cancer | [84,85,98,99] |

\*Kaplan-Meier survival p value shown in Figure S6.

**Table S4.** Spearman correlations between imaging mass cytometry (IMC) cell densities and selected genes in the micro-dissected fibroblastic stromal compartment of high-grade serous ovarian cancer (HGSC).

| Gene Name      | Correlated IMC Feature | Correlation Coefficient | <i>p</i> | Kaplan-Meier Survival <i>p</i> * | Function                                                                                                            | Refs.   |
|----------------|------------------------|-------------------------|----------|----------------------------------|---------------------------------------------------------------------------------------------------------------------|---------|
| <i>ANGPTL2</i> | CD31                   | 0.461                   | 0.0176   | 0.0005                           | Induces endothelial cell sprouting; CAF-derived Angptl2 promotes tumor progression                                  | [60,61] |
|                | CD73_1                 | 0.558                   | 0.0030   |                                  |                                                                                                                     |         |
|                | CD73_2                 | 0.672                   | 0.0001   |                                  |                                                                                                                     |         |
| <i>ANGPTL4</i> | CD31                   | 0.441                   | 0.0238   | 0.044                            | Increases reactive oxygen species rate favoring tumor growth and decreases immune cell infiltration; poor prognosis | [100]   |
| <i>BMPR1B</i>  | CD4_4                  | -0.508                  | 0.008    | 0.046                            | Decreases immune trafficking; poor prognosis                                                                        | [89]    |
| <i>CCDC85B</i> | CD73_1                 | 0.497                   | 0.0097   | 0.014                            | Promotes cancer cell proliferation and invasion                                                                     | [40]    |
|                | CD73_2                 | 0.599                   | 0.0012   |                                  |                                                                                                                     |         |
| <i>DDAH1</i>   | CD73_2                 | 0.418                   | 0.0332   | 0.0055                           | Associated with tumor progression and poor prognosis                                                                | [41]    |

|                      |        |        |              |         |                                                                                                                                     |           |
|----------------------|--------|--------|--------------|---------|-------------------------------------------------------------------------------------------------------------------------------------|-----------|
| <i>EFEMP2</i>        | CD73_1 | 0.556  | 0.0031       | 0.043   | Promotes cancer cell growth and invasion; poor prognosis                                                                            | [42]      |
|                      | CD73_2 | 0.589  | 0.0015       |         |                                                                                                                                     |           |
| <i>F2RL1 (PAR2)</i>  | CD31   | 0.586  | 0.0016       | 0.0002  | Promotes cancer cell invasion and metastasis                                                                                        | [43]      |
|                      | CD73_1 | 0.419  | 0.0329       |         |                                                                                                                                     |           |
|                      | CD73_2 | 0.524  | 0.0059       |         |                                                                                                                                     |           |
| <i>FN1</i>           | CD31   | 0.425  | 0.0303       | 0.011   | Induces cancer and endothelial cell migration                                                                                       | [101,102] |
|                      | CD73_1 | 0.733  | <0.00010.003 |         |                                                                                                                                     |           |
|                      | CD73_2 | 0.548  | 7            |         |                                                                                                                                     |           |
| <i>FRMD3</i>         | CD73_1 | -0.587 | 0.0016       | 0.0063  | Tumor suppressor                                                                                                                    | [103]     |
| <i>GPC1</i>          | CD73_1 | 0.622  | 0.0006       | 0.047   | Associated with tumorigenesis and regulating angiogenesis for cancer progression and invasion                                       | [104]     |
|                      | CD73_2 | 0.735  | <0.0001      |         |                                                                                                                                     |           |
| <i>GPX3</i>          | CD4_4  | -0.403 | 0.0406       | 0.011   | Protects cells and enzymes from oxidative damage; poor survival in ovarian cancer                                                   | [105]     |
|                      | CD73_2 | 0.444  | 0.0230       |         |                                                                                                                                     |           |
| <i>HMOX2 (HO-1)</i>  | CD73_1 | 0.416  | 0.0342       | <0.0001 | Activated by the transcription factor Nrf2, increases chemoresistance                                                               | [57]      |
|                      | CD73_2 | 0.554  | 0.0032       |         |                                                                                                                                     |           |
| <i>ICMT</i>          | CD73_1 | 0.496  | 0.0098       | 0.045   | Increases chemoresistance in ovarian cancer                                                                                         | [58]      |
|                      | CD73_2 | 0.735  | <0.0001      |         |                                                                                                                                     |           |
| <i>ITGA11</i>        | CD73_1 | 0.675  | 0.0001       | 0.047   | Receptor for collagen remodeling and cancer-associated fibroblast migration in the tumor microenvironment                           | [106]     |
|                      | CD73_2 | 0.652  | 0.0003       |         |                                                                                                                                     |           |
| <i>ITGB1</i>         | CD73_2 | 0.585  | 0.0016       | 0.016   | Promotes angiogenesis, tumorigenesis, and cancer progression                                                                        | [44]      |
| <i>LDLR</i>          | CD31   | 0.435  | 0.0261       | 0.028   | Activates Wnt pathway, involved in cancer progression                                                                               | [107]     |
| <i>LOX</i>           | CD31   | 0.436  | 0.0259       | 0.0092  | Driver of tumor migration and angiogenesis; poor prognosis in ovarian cancer                                                        | [45,108]  |
|                      | CD73_1 | 0.718  | <0.0001      |         |                                                                                                                                     |           |
|                      | CD73_2 | 0.611  | 0.0008       |         |                                                                                                                                     |           |
| <i>LRRC32 (GARP)</i> | CD73_1 | 0.586  | 0.0016       | 0.0078  | Regulates TGF- $\beta$ , which drives cancer-associated fibroblast formation, and inhibits cytotoxicity of CD8 <sup>+</sup> T cells | [67,88]   |
|                      | CD73_2 | 0.651  | 0.0003       |         |                                                                                                                                     |           |
| <i>MFGE8</i>         | CD31   | 0.643  | 0.0003       | 0.035   | Increases VEGF and ET-1 levels; enhances M2 polarization of macrophages and promotes tumor angiogenesis                             | [46,47]   |
|                      | CD73_1 | 0.649  | 0.0003       |         |                                                                                                                                     |           |
|                      | CD73_2 | 0.459  | 0.0183       |         |                                                                                                                                     |           |
| <i>MICAL2</i>        | CD31   | 0.439  | 0.0246       | 0.016   | Accelerates tumor progression by regulating cell proliferation and epithelial-mesenchymal transition                                | [48]      |
|                      | CD73_1 | 0.604  | 0.0010       |         |                                                                                                                                     |           |
|                      | CD73_2 | 0.629  | 0.0005       |         |                                                                                                                                     |           |

|                       |        |        |         |        |                                                                                                                               |            |
|-----------------------|--------|--------|---------|--------|-------------------------------------------------------------------------------------------------------------------------------|------------|
| <i>MICU1</i>          | CD73_1 | 0.558  | 0.0030  | 0.031  | Increases chemoresistance;<br>poor survival in ovarian<br>cancer                                                              | [109]      |
|                       | CD73_2 | 0.676  | 0.0001  |        |                                                                                                                               |            |
| <i>MKL1</i>           | CD73_1 | 0.598  | 0.0012  | 0.039  | Promotes ovarian cancer cell<br>migration and invasion                                                                        | [110]      |
|                       | CD73_2 | 0.613  | 0.0008  |        |                                                                                                                               |            |
| <i>MSRB3</i>          | CD73_1 | 0.420  | 0.0323  | 0.045  | Increases tumorigenesis in<br>ovarian cancer                                                                                  | [49]       |
|                       | CD73_2 | 0.653  | 0.0002  |        |                                                                                                                               |            |
| <i>MT1E</i>           | CD31   | 0.459  | 0.0182  | 0.04   | Poor prognosis in ovarian<br>cancer                                                                                           | [111]      |
|                       | CD73_1 | 0.586  | 0.0016  |        |                                                                                                                               |            |
|                       | CD73_2 | 0.587  | 0.0016  |        |                                                                                                                               |            |
| <i>MYO10</i>          | CD4_4  | −0.551 | 0.0034  | 0.043  | Regulates cancer-associated<br>fibroblast rigidity                                                                            | [64,65]    |
| <i>NCAM1</i>          | CD4_4  | −0.410 | 0.0374  | 0.038  | Stimulates ovarian cancer cell<br>migration and invasion                                                                      | [50]       |
|                       | TU_9   | 0.424  | 0.0306  |        |                                                                                                                               |            |
| <i>NPTX2</i>          | CD4_4  | −0.424 | 0.0306  | 0.012  | Promotes cancer growth                                                                                                        | [51]       |
|                       | CD73_2 | 0.527  | 0.0055  |        |                                                                                                                               |            |
| <i>PALLD</i>          | CD73_1 | 0.631  | 0.0005  | 0.015  | Induces activation of stromal<br>fibroblasts, cell migration,<br>and invasion through<br>epithelial-mesenchymal<br>transition | [112]      |
|                       | CD73_2 | 0.715  | <0.0001 |        |                                                                                                                               |            |
| <i>PLAT (tPA)</i>     | CD73_1 | 0.507  | 0.0081  | 0.032  | Poor prognosis in ovarian<br>cancer                                                                                           | [52]       |
|                       | CD73_2 | 0.643  | 0.0003  |        |                                                                                                                               |            |
| <i>PLOD2</i>          | CD73_1 | 0.636  | 0.0004  | 0.028  | Expressed in cancer-<br>associated fibroblasts,<br>promotes tumor cell invasion<br>and migration                              | [63]       |
|                       | CD73_2 | 0.544  | 0.0040  |        |                                                                                                                               |            |
| <i>SHISA2</i>         | CD73_2 | 0.535  | 0.0047  | 0.014  | Regulates WNT5A; enhances<br>cancer aggressive phenotype                                                                      | [113]      |
| <i>SLC22A17</i>       | CD73_1 | 0.458  | 0.0184  | 0.0079 | Receptor for LCN2; poor<br>prognosis                                                                                          | [114]      |
|                       | CD73_2 | 0.422  | 0.0313  |        |                                                                                                                               |            |
| <i>SLC2A3 (GLUT3)</i> | CD73_1 | 0.703  | <0.0001 | 0.048  | Promotes tumor cell<br>proliferation; poor prognosis<br>in ovarian cancer                                                     | [53,115]   |
|                       | CD73_2 | 0.562  | 0.0027  |        |                                                                                                                               |            |
| <i>SPSB1</i>          | CD73_1 | 0.511  | 0.0075  | 0.0096 | Increases proliferation and<br>migration of ovarian cancer<br>cells                                                           | [54]       |
|                       | CD73_2 | 0.459  | 0.0183  |        |                                                                                                                               |            |
| <i>TFRC (CD71)</i>    | CD73_2 | 0.400  | 0.0427  | 0.02   | Enhances the rate of c-Myc-<br>mediated tumor formation                                                                       | [116,117]  |
| <i>TGFBI</i>          | CD73_1 | 0.516  | 0.0069  | 0.032  | Produced by tissue-<br>associated macrophages,<br>increases HGSC cell<br>migration                                            | [87]       |
|                       | CD73_2 | 0.704  | <0.0001 |        |                                                                                                                               |            |
| <i>TNC</i>            | CD73_1 | 0.574  | 0.0021  | 0.04   | Produced by TAM, increases<br>HGSC cell migration                                                                             | [69,70,87] |
|                       | CD73_2 | 0.613  | 0.0008  |        |                                                                                                                               |            |
| <i>TSPAN4</i>         | CD73_1 | 0.533  | 0.0050  | 0.042  | Poor prognosis                                                                                                                | [118]      |
|                       | CD73_2 | 0.559  | 0.0029  |        |                                                                                                                               |            |
| <i>TSPAN9</i>         | CD73_1 | 0.482  | 0.0125  | 0.044  | Chemoresistance; poor<br>prognosis                                                                                            | [59]       |
|                       | CD73_2 | 0.713  | <0.0001 |        |                                                                                                                               |            |
| <i>VASN</i>           | CD73_1 | 0.562  | 0.0027  | 0.044  | Stimulates tumor progression<br>and angiogenesis                                                                              | [55]       |
|                       | CD73_2 | 0.611  | 0.0009  |        |                                                                                                                               |            |

|             |        |        |        |       |                                                           |      |
|-------------|--------|--------|--------|-------|-----------------------------------------------------------|------|
| VSTM4       | CD4_4  | -0.429 | 0.0286 | 0.037 | Negative regulator of T cells                             | [66] |
| WWTR1 (TAZ) | CD4_4  | -0.589 | 0.0015 | 0.024 | In stromal cells, triggers effects with positive feedback | [62] |
|             | CD73_2 | 0.479  | 0.0132 |       | on the growth of tumor cells                              |      |

\*Kaplan-Meier survival p value shown in Figure 7.

## References

- Janik, S.; Bekos, C.; Hacker, P.; Raunegger, T.; Schiefer, A.-I.; Müllauer, L.; Veraar, C.; Dome, B.; Klepetko, W.; Ankersmit, H.J.; et al. Follistatin impacts Tumor Angiogenesis and Outcome in Thymic Epithelial Tumors. *Sci. Rep.* **2019**, *9*, 1–12, doi:10.1038/s41598-019-53671-8.
- Kozian, D.H.; Ziche, M.; Augustin, H.G. The activin-binding protein follistatin regulates autocrine endothelial cell activity and induces angiogenesis. *Lab. Investig.* **1997**, *76*, 267–276.
- E Cunliffe, H.; Jiang, Y.; Fornace, K.M.; Yang, F.; Meltzer, P.S. PAR6B is required for tight junction formation and activated PKC $\zeta$  localization in breast cancer. *Am. J. Cancer Res.* **2012**, *2*, 478–491.
- Noye, T.M.; Lokman, N.A.; Oehler, M.K.; Ricciardelli, C. S100A10 and Cancer Hallmarks: Structure, Functions, and its Emerging Role in Ovarian Cancer. *Int. J. Mol. Sci.* **2018**, *19*, 4122.
- Oberst, M.D.; Johnson, M.D.; Dickson, R.B.; Lin, C.Y.; Singh, B.; Stewart, M.; Williams, A.; al-Nafussi, A.; Smyth, J.F.; and Gabra, H.; et al. Expression of the serine protease matriptase and its inhibitor HAI-1 in epithelial ovarian cancer: Correlation with clinical outcome and tumor clinicopathological parameters. *Clin. Cancer Res. Off. J. Am. Assoc. Cancer Res.* **2002**, *8*, 1101–1107.
- Gómez-Abenza, E.; Ibáñez-Molero, S.; García-Moreno, D.; Fuentes, I.; Zon, L.I.; Mione, M.C.; Cayuela, M.L.; Gabellini, C.; Mulero, V. Zebrafish modeling reveals that SPINT1 regulates the aggressiveness of skin cutaneous melanoma and its crosstalk with tumor immune microenvironment. *J. Exp. Clin. Cancer Res.* **2019**, *38*, 1–14, doi:10.1186/s13046-019-1389-3.
- Salerno, E.P.; Bedognetti, D.; Mauldin, I.S.; Deacon, D.H.; Shea, S.M.; Pinczewski, J.; Obeid, J.M.; Coukos, G.; Wang, E.; Gajewski, T.F.; et al. Human melanomas and ovarian cancers overexpressing mechanical barrier molecule genes lack immune signatures and have increased patient mortality risk. *Oncoimmunology* **2016**, *5*, e1240857.
- Bertin, S.; Lozano-Ruiz, B.; Bachiller, V.; García-Martínez, I.; Herdman, S.; Zapater, P.; Frances, R.; Such, J.; Lee, J.; González-Navajas, J.M.; et al. Dual Specificity Phosphatase 6 (DUSP6) regulates CD4+ T cell functions and restrains the spontaneous colitis in IL-10 deficient mice. *Mucosal Immunol.* **2015**, *8*, 505–515.
- Hsu, W.-C.; Chen, M.-Y.; Hsu, S.-C.; Huang, L.-R.; Kao, C.-Y.; Cheng, W.-H.; Pan, C.-H.; Wu, M.-S.; Yu, G.-Y.; Hung, M.-S.; et al. DUSP6 mediates T cell receptor-engaged glycolysis and restrains TFH cell differentiation. *Proc. Natl. Acad. Sci. USA* **2018**, *115*, E8027–E8036, doi:10.1073/pnas.1800076115.
- La Paglia, L.; Listì, A.; Caruso, S.; Amodeo, V.; Passiglia, F.; Bazan, V.; Fanale, D. Potential Role of ANGPTL4 in the Cross Talk between Metabolism and Cancer through PPAR Signaling Pathway. *PPAR Res.* **2017**, *2017*, 1–15, doi:10.1155/2017/8187235.
- Lou, X.; Han, X.; Jin, C.; Tian, W.; Yu, W.; Ding, D.; Cheng, L.; Huang, B.; Jiang, H.; Lin, B. SOX2 Targets Fibronectin 1 to Promote Cell Migration and Invasion in Ovarian Cancer: New Molecular Leads for Therapeutic Intervention. *OMICS A J. Integr. Biol.* **2013**, *17*, 510–518, doi:10.1089/omi.2013.0058.
- Zou, L.; Cao, S.; Kang, N.; Huebert, R.C.; Shah, V.H. Fibronectin Induces Endothelial Cell Migration through  $\beta$ 1 Integrin and Src-dependent Phosphorylation of Fibroblast Growth Factor Receptor-1 at Tyrosines 653/654 and 766. *J. Biol. Chem.* **2012**, *287*, 7190–7202.
- Haase, D.; Meister, M.; Muley, T.; Hess, J.; Teurich, S.; Schnabel, P.; Hartenstein, B.; Angel, P. FRMD3, a novel putative tumour suppressor in NSCLC. *Oncogene* **2007**, *26*, 4464–4468, doi:10.1038/sj.onc.1210225.
- Wang, S.; Qiu, Y.; Bai, B. The Expression, Regulation, and Biomarker Potential of Glypican-1 in Cancer. *Front. Oncol.* **2019**, *9*, 614, doi:10.3389/fonc.2019.00614.
- Worley, B.L.; et al. GPx3 supports ovarian cancer progression by manipulating the extracellular redox environment. *Redox Biol.* **2019**, *25*, 101051.
- Zeltz, C.; Alam, J.; Liu, H.; Erusappan, P.M.; Hoschuetzky, H.; Molven, A.; Parajuli, H.; Cukierman, E.; Costea, D.-E.; Lu, N.; et al.  $\alpha$ 11 $\beta$ 1 Integrin is Induced in a Subset of Cancer-Associated Fibroblasts in Desmoplastic Tumor Stroma and Mediates In Vitro Cell Migration. *Cancers* **2019**, *11*, 765, doi:10.3390/cancers11060765.
- Roslan, Z.; Muhamad, M.; Selvaratnam, L.; Ab-Rahim, S. The Roles of Low-Density Lipoprotein Receptor-Related Proteins 5, 6, and 8 in Cancer: A Review. *J. Oncol.* **2019**, *2019*, 1–6, doi:10.1155/2019/4536302.
- Baker, A.-M.; Bird, D.; Welti, J.C.; Gourlaouen, M.; Lang, G.; Murray, G.I.; Reynolds, A.R.; Cox, T.R.; Erler, J.T. Lysyl Oxidase Plays a Critical Role in Endothelial Cell Stimulation to Drive Tumor Angiogenesis. *Cancer Res.* **2013**, *73*, 583–594, doi:10.1158/0008-5472.can-12-2447.
- Chakraborty, P.K.; Mustafi, S.B.; Xiong, X.; Dwivedi, S.K.D.; Nesin, V.; Saha, S.; Zhang, M.; Dhanasekaran, D.; Jayaraman, M.; Mukherjee, P.; et al. MICU1 drives glycolysis and chemoresistance in ovarian cancer. *Nat. Commun.* **2017**, *8*, 14634.
- Xu, W.; Xu, H.; Fang, M.; Wu, X.; Xu, Y. MKL1 links epigenetic activation of MMP2 to ovarian cancer cell migration and invasion. *Biochem. Biophys. Res. Commun.* **2017**, *487*, 500–508, doi:10.1016/j.bbrc.2017.04.006.
- Si, M.; Lang, J. The roles of metallothioneins in carcinogenesis. *J. Hematol. Oncol.* **2018**, *11*, 1–20, doi:10.1186/s13045-018-0645-x.

112. Brentnall, T.A.; Lai, L.A.; Coleman, J.; Bronner, M.P.; Pan, S.; Chen, R. Arousal of Cancer-Associated Stroma: Overexpression of Palladin Activates Fibroblasts to Promote Tumor Invasion. *PLoS ONE* **2012**, *7*, e30219.
113. Tamura, K.; Furihata, M.; Satake, H.; Hashida, H.; Kawada, C.; Osakabe, H.; Fukuhara, H.; Kumagai, N.; Iiyama, T.; Shuin, T.; et al. SHISA2 enhances the aggressive phenotype in prostate cancer through the regulation of WNT5A expression. *Oncol. Lett.* **2017**, *14*, 6650–6658, doi:10.3892/ol.2017.7099.
114. Miyamoto, T.; Kashima, H.; Yamada, Y.; Kobara, H.; Asaka, R.; Ando, H.; Shiozawa, T. Lipocalin 2 Enhances Migration and Resistance against Cisplatin in Endometrial Carcinoma Cells. *PLoS ONE* **2016**, *11*, e0155220, doi:10.1371/journal.pone.0155220.
115. Masin, M.; Vazquez, J.; Rossi, S.; Groeneveld, S.; Samson, N.; Schwalie, P.C.; Deplancke, B.; Frawley, L.E.; Gouttenoire, J.; Moradpour, D.; et al. GLUT3 is induced during epithelial-mesenchymal transition and promotes tumor cell proliferation in non-small cell lung cancer. *Cancer Metab.* **2014**, *2*, 11, doi:10.1186/2049-3002-2-11.
116. O'Donnell, K.A.; Yu, D.; Zeller, K.I.; Kim, J.-W.; Racke, F.; Thomas-Tikhonenko, A.; Dang, C.V. Activation of Transferrin Receptor 1 by c-Myc Enhances Cellular Proliferation and Tumorigenesis. *Mol. Cell. Biol.* **2006**, *26*, 2373–2386, doi:10.1128/mcb.26.6.2373-2386.2006.
117. Shen, Y.; Li, X.; Dong, D.; Zhang, B.; Xue, Y.; Shang, P. Transferrin receptor 1 in cancer: A new sight for cancer therapy. *Am. J. Cancer Res.* **2018**, *8*, 916–931.
118. Qi, W.; Sun, L.; Liu, N.; Zhao, S.; Lv, J.; Qiu, W. Tetraspanin family identified as the central genes detected in gastric cancer using bioinformatics analysis. *Mol. Med. Rep.* **2018**, *18*, 3599–3610, doi:10.3892/mmr.2018.9360.
